# Supplementary material for: Golgi localization of ERManI defines spatial separation of the mammalian glycoprotein quality control system
Source: PubMed Central journal article supplement — Mol Biol Cell. 2011 Aug 15;22(16):2810–22. doi: 10.1091/mbc.E11-02-0118 (PMC3154878; doi:10.1091/mbc.e11-02-0118), 2011-08-15

# Figure S1.

ERManI

transfection:

+

-

+

-

85-

66-

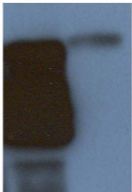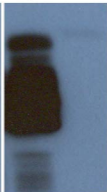

Blot with:

3C2

4H12

Figure S2.

Recovered peptide list of alpha 1,2-mannosidase (gi:770647) from 90kDa band

| sequence              | repeat number |
|-----------------------|---------------|
| ADSYEYLLK             | 60            |
| DKMESFFLGETLK         | 23            |
| DVDVNLFEFSTIR         | 28            |
| DVEVKPADR             | 1             |
| FAWGHDELKPVSR         | 9             |
| FQEAVEK               | 1             |
| GPPHLQIRPPSQDLK       | 12            |
| GVIDVFLHAWK           | 4             |
| IPYSDVNIGTGVAHPPR     | 38            |
| KFAWGHDELKPVSR        | 1             |
| LTFVGELAHGR           | 37            |
| LTGDKKFQEAVEK         | 1             |
| MESFFLGETLK           | 4             |
| MRPEIAGLKPANPPVLPAPQK | 18            |
| PANPPVLPAPQK          | 1             |
| QETQLLEDYVEAIEGVR     | 1             |
| QMETGLSPEIVHFNLYPQPGR | 3             |
| VPSGGYSSINNVQDPQKPEPR | 18            |
| VTQHIHGLSGK           | 10            |

MAACEGRRSGALGSSQSDFLTPPVGGAPWAVATTVMYPPPPPPHRDFISVTLSEFGEYDNSKSWRRRSCWRKWK  
QLSRLQRNMILFLLAFLLFCGLLFYINLADHWKALAFRLEEEQK**MRPEIAGLKPANPPVLPAPQK**ADTDPENLPEISSQK  
TQRHIQR**GPPHLQIRPPSQDLK**DGTQEATKRQEAPVDPDRPEGDPQRTVISWRGAVIEPEQGTELPARRAEVPTKPPLP  
PARTQGTPVHLNRYRQK**GVIDVFLHAWK**GYR**KFAWGHDELKPVSR**SFSEWFGLGLTLIDALDTMWILGLRKEFEEARK  
WVSKKLHFEEK**DVDVNLFEFSTIR**ILGGLLSAYHLSGDSLFLRKAEDFGNRLMPAFRT**TPSKIPYSDVNIGTGVAHPPR**WTS  
DSTVAEVTSIQLEFRELSR**LTGDKKFQEAVEK****VTQHIHGLSGK**KDGLVPMFINTHSGLFTHLGVFTLGAR**ADSYEYLLK**  
QWIQGGK**QETQLLEDYVEAIEGVR**THLLRHSEPSK**LTFVGELAHGR**FSAKMDHLVCFLPGTLALGVYHGLPASHMELA  
QELMETCYQMNR**QMETGLSPEIVHFNLYPQPGR****RDVEVKPADRHNLRPETVESLFYLYR**VTGDRKYQDWGWEILQ  
SFSRFTR**VPSGGYSSINNVQDPQKPEPR****DKMESFFLGETLK**YLFLLFSDDPNLLSLDAYVFNTEAHPLPIWTP

(A total 30.41 % of sequence was recovered)

## Recovered peptide list of alpha 1,2-mannosidase (gi:770647) from 70kDa band

| sequence              | repeat number |
|-----------------------|---------------|
| DVDVNLFFESTIR         | 2             |
| IPYSDVNIGTGVAHPPR     | 2             |
| LTFVGELAHGR           | 1             |
| QMETGLSPEIVHFNLYPQPGR | 1             |

MAACEGRRSGALGSSQSDFLTPPVGGAPWAVATTVVMYPPPPPPHRDFISVTLFSGESYDNSKSWRRRSCWRKWK  
QLSRLQRNMILFLLAFLLFCGLLFYINLADHWKALAFRLEEEQKMRPEIAGLKPANPPVLPAPQKADTDPENLPEISSQKT  
QRHIQRGPPHLQIRPPSQDLKDGTEATKRQEAPVDPRPEGDPQRTVISWRGAVIEPEQGTELPSRRAEVPTKPPLPP  
ARTQGTPVHLNYRQKGVLDVFLHAWKGYRKFVWGHDELKPVSRSEWFGGLTLIDALDTMWILGLRKEFEARKW  
VSKLHFEK**DVDVNLFFESTIR**ILGGLLSAYHLSGDSLFLRKAEDFGNRLMPAFRTPSK**IPYSDVNIGTGVAHPPR**WTS  
TVAEVTSIQLEFRELSRLTGDKKFQEAQVEKVTQHIHGLSGKDGGLVPMFINTHSGLFTHLGVFTLGARADSYEYLLKQWI  
QGGKQETQLLEDYVEAIEGVRTHLLRHSEPSK**LTFVGELAHGR**FSAKMDHLVCFPLPGLALGVYHGLPASHMELAQEL  
METCYQMNR**QMETGLSPEIVHFNLYPQPGR**RDVEVKPADRHNLRLPETVESLFYLYRVTGDRKYQDWGWELQSF  
FTRVPSGGYSSINNVQDPQKPEPRDKMESFFLGETLKYLFLLFSDDPNLLSLDAYVFNTEAHPLPIWTP

(A total 8.50 % of sequence was recovered)

Figure S3.

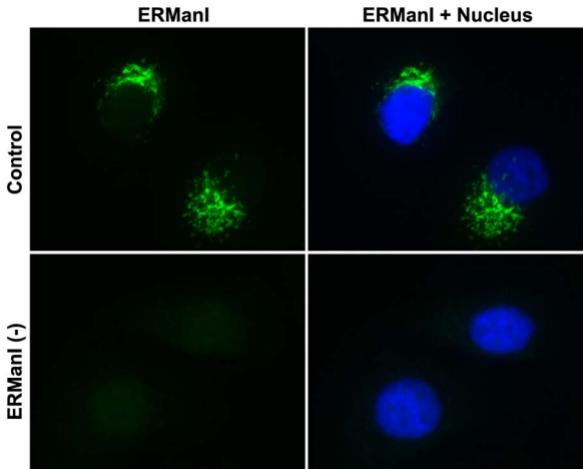

Figure S4

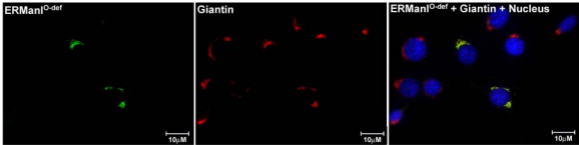

Figure S5

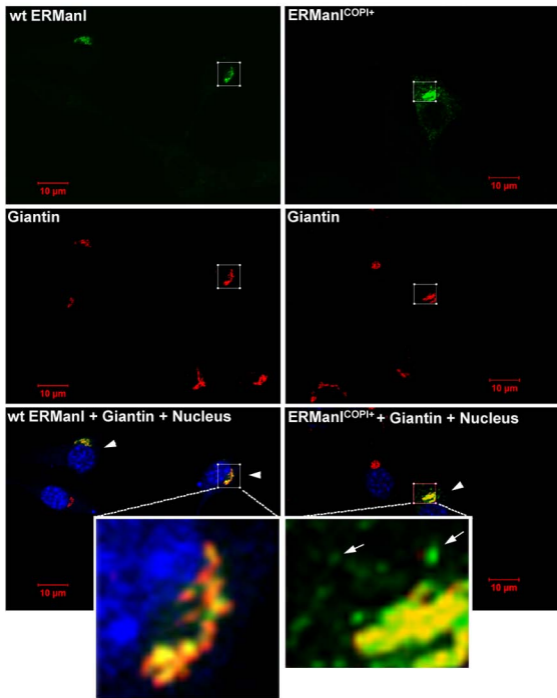

Supplement: E11-02-0118_1.pdf [file E11-02-0118_1.pdf]
